# Supplementary material for: Interaction between Metabolic Genetic Risk Score and Dietary Fatty Acid Intake on Central Obesity in a Ghanaian Population
Source: Nutrients. 2020 Jun 27;12(7):1906. doi: 10.3390/nu12071906 (PMC7400498; doi:10.3390/nu12071906)
Supplement: Supplementary file 1 [file nutrients-12-01906-s001.pdf]

## Supplementary Materials

**Table S1.** Genotype distribution of the fifteen SNPs that were included in the metabolic-GRS

| Gene          | SNP        | Genotype | Genotype Frequency | Nucleotide change | MAF     | dbSNP* frequency in Africans | HWE  |
|---------------|------------|----------|--------------------|-------------------|---------|------------------------------|------|
| <i>TCF7L2</i> | rs12255372 | GG       | 117                | G/T               | T= 0.37 | G=0.73                       | 0.47 |
|               |            | TG       | 144                |                   |         | T=0.27                       |      |
|               |            | TT       | 37                 |                   |         |                              |      |
| <i>TCF7L2</i> | rs7903146  | CC       | 162                | C/T               | T= 0.27 | C=0.74                       | 0.42 |
|               |            | TC       | 111                |                   |         | T=0.26                       |      |
|               |            | TT       | 24                 |                   |         |                              |      |
| <i>MC4R</i>   | rs17782313 | CC       | 19                 | C/T               | C= 0.25 | T=0.66                       | 0.86 |
|               |            | TC       | 110                |                   |         | C=0.34                       |      |
|               |            | TT       | 168                |                   |         |                              |      |
| <i>MC4R</i>   | rs2229616  | GA       | 9                  | A/G               | A= 0.02 | G=0.99                       | 0.79 |
|               |            | GG       | 290                |                   |         | A=0.01                       |      |
| <i>PPAR</i>   | rs1801282  | CC       | 298                | C/G               | G=0     | C=1                          | 0.98 |
|               |            | GC       | 1                  |                   |         | G=NONE                       |      |
| <i>FTO</i>    | rs9939609  | AA       | 60                 | A/T               | A=0.47  | A=0.52                       | 0.11 |
|               |            | TA       | 163                |                   |         | T=0.48                       |      |
|               |            | TT       | 76                 |                   |         |                              |      |
| <i>FTO</i>    | rs10163409 | AA       | 296                | A/T               | T=0     | A=0.98                       | 0.95 |
|               |            | TA       | 2                  |                   |         | T=0.02                       |      |
| <i>CDKN2B</i> | rs10811661 | CT       | 18                 | C/T               | C= 0    | T=0.98                       | 0.59 |
|               |            | TT       | 280                |                   |         | C=0.02                       |      |
| <i>KCNQ1</i>  | rs2237895  | AA       | 230                | A/C               | C=0.12  | A=0.85                       | 0.02 |
|               |            | CA       | 69                 |                   |         | C=0.15                       |      |
| <i>KCNQ1</i>  | rs2237892  | CC       | 203                | C/T               | T=0.16  | C=0.9                        | 0.09 |
|               |            | TC       | 90                 |                   |         | T=0.1                        |      |
|               |            | TT       | 4                  |                   |         |                              |      |
| <i>ADIPOQ</i> | rs266729   | CC       | 248                | C/G               | G= 0.08 | C=0.92                       | 0.12 |
|               |            | GC       | 49                 |                   |         | G=0.08                       |      |
| <i>ADIPOQ</i> | rs17846866 | TT       | 297                | G/T               | G=0.0   | T=1                          | -    |
|               |            |          |                    |                   |         | G=0                          |      |
| <i>CAPN10</i> | rs2975760  | CC       | 1                  | C/T               | C= 0.02 | T=0.7                        | 0.01 |
|               |            | TC       | 10                 |                   |         | C=0.3                        |      |
|               |            | TT       | 281                |                   |         |                              |      |
| <i>CAPN10</i> | rs5030952  | CC       | 57                 | C/T               | C=0.44  | T=0.53                       | 0.90 |
|               |            | TC       | 145                |                   |         | C=0.47                       |      |
|               |            | TT       | 95                 |                   |         |                              |      |
| <i>CAPN10</i> | rs3792267  | AA       | 1                  | A/G               | A= 0.12 | G=0.88                       | 0.09 |
|               |            | GA       | 67                 |                   |         | A=0.12                       |      |
|               |            | GG       | 227                |                   |         |                              |      |

Abbreviations: SNP, Single nucleotide polymorphisms; GRS, Genetic risk score; MAF, Minor allele frequency; HWE, Hardy- Weinberg equilibrium; *TCF7L2*, Transcription factor 7-like 2; *MC4R*, Melanocortin 4 Receptor; *FTO*, Fat mass and obesity-associated; *ADIPOQ*, Adiponectin; *KCNQ1*, Potassium voltage-gated channel subfamily Q member 1; *CDKN2A/2B*, Cyclin dependent kinase inhibitor 2A/2B; *CAPN10*, Calpain 10; *PPARG*, Peroxisome proliferator-activated receptor gamma.

\* dbSNP database: <https://www.ncbi.nlm.nih.gov/snp/>

**Table S2.** Characteristics of the study participants stratified based on sex.

|                              | <b>Total</b><br><b>(N=302)</b> | <b>Men</b><br><b>(N=126)</b> | <b>Women</b><br><b>(N=176)</b> | <b>P value *</b> |
|------------------------------|--------------------------------|------------------------------|--------------------------------|------------------|
| Age (years)                  | 38.17 ± 9.64                   | 35.97 ± 9.02                 | 39.74 ± 9.79                   | <0.001           |
| BMI (kg/m <sup>2</sup> )     | 26.63 ± 4.99                   | 23.63 ± 3.12                 | 28.79 ± 4.96                   | <0.001           |
| WC (cm)                      | 88.48 ± 12.41                  | 81.75 ± 10.05                | 93.31 ± 11.68                  | <0.001           |
| WHR                          | 1.45 ± 6.96                    | 0.87 ± 0.09                  | 1.86 ± 9.10                    | 0.15             |
| Visceral fat (%)             | 8.02 ± 7.39                    | 7.99 ± 10.75                 | 8.04 ± 3.36                    | 0.96             |
| Body fat (%)                 | 33.12 ± 13.90                  | 21.03 ± 11.53                | 41.78 ± 7.54                   | <0.001           |
| Total energy intake (%)      | 1647.93 ± 685.83               | 1915.18 ± 710.80             | 1456.61 ± 599.92               | <0.001           |
| Protein intake (g/day)       | 53.24 ± 23.73                  | 64.25 ± 25.10                | 45.36 ± 19.21                  | <0.001           |
| Total fat intake (g/day)     | 51.17 ± 26.94                  | 58.20 ± 29.71                | 46.13 ± 23.60                  | 0.001            |
| Carbohydrates intake (g/day) | 239.03 ± 95.84                 | 279.36 ± 102.02              | 210.16 ± 79.73                 | <0.001           |
| Fibre intake (g/day)         | 21.31 ± 10.84                  | 24.52 ± 11.93                | 19.00 ± 9.36                   | <0.001           |
| Total SFA intake (g/day)     | 16.23 ± 10.36                  | 18.44 ± 11.96                | 14.66 ± 8.74                   | 0.004            |
| Total MUFA intake (g/day)    | 18.08 ± 10.49                  | 20.62 ± 11.60                | 16.25 ± 9.22                   | 0.002            |
| Total PUFA intake (g/day)    | 9.12 ± 5.03                    | 10.39 ± 5.57                 | 8.21 ± 4.40                    | 0.002            |

Data presented as means ± standard deviations. \*P values for the differences in the means between men and women were calculated using the Independent t-test.

Abbreviations: BMI, Body mass index; WC, Waist circumference; WHR, Waist hip ratio, SFA, Saturated fatty acids; MUFA, Monounsaturated fatty acids; PUFA, Polyunsaturated fatty acids.

**Table S3.** Associations of the 12-SNP GRS with obesity-related traits.

|                          | <b>GRS <math>\leq</math> 4 risk alleles</b> | <b>GRS <math>&gt;</math> 4 risk alleles</b> | <b>P value*</b> |
|--------------------------|---------------------------------------------|---------------------------------------------|-----------------|
|                          | <b>(N=149)</b>                              | <b>(N=135)</b>                              |                 |
| BMI (kg/m <sup>2</sup> ) | 26.82 $\pm$ 0.43                            | 26.31 $\pm$ 0.40                            | 0.74            |
| WC (cm)                  | 89.04 $\pm$ 1.05                            | 87.70 $\pm$ 1.02                            | 0.29            |
| WHR                      | 2.03 $\pm$ 0.81                             | 0.88 $\pm$ 0.01                             | 0.28            |
| Visceral fat (%)         | 8.16 $\pm$ 0.63                             | 7.95 $\pm$ 0.65                             | 0.65            |
| Body fat (%)             | 33.35 $\pm$ 1.19                            | 32.91 $\pm$ 1.14                            | 0.11            |

Data are means  $\pm$  standard errors. \*P values obtained from linear regression analysis adjusted for age, sex and additionally for BMI when BMI is not an outcome. The analysis was performed on log-transformed variables.

Abbreviations: SNP, Single nucleotide polymorphism; GRS, Genetic risk score; BMI, Body mass index; WC, Waist circumference; WHR, Waist hip ratio.

**Table S4.** Associations of the 8-SNP GRS with obesity-related traits.

|                          | <b>GRS <math>\leq</math> 4 risk alleles</b> | <b>GRS <math>&gt;</math> 4 risk alleles</b> | <b>P value*</b> |
|--------------------------|---------------------------------------------|---------------------------------------------|-----------------|
|                          | <b>(N=159)</b>                              | <b>(N=127)</b>                              |                 |
| BMI (kg/m <sup>2</sup> ) | 26.76 $\pm$ 0.41                            | 26.28 $\pm$ 0.41                            | 0.86            |
| WC (cm)                  | 89.02 $\pm$ 1.01                            | 87.5 $\pm$ 1.06                             | 0.67            |
| WHR                      | 1.96 $\pm$ 0.76                             | 0.88 $\pm$ 0.01                             | 0.31            |
| Visceral fat (%)         | 8.1 $\pm$ 0.59                              | 7.96 $\pm$ 0.69                             | 0.66            |
| Body fat (%)             | 33.19 $\pm$ 1.14                            | 32.84 $\pm$ 1.18                            | 0.07            |

Data are means  $\pm$  standard errors. \*P values obtained from linear regression analysis adjusted for age, sex and additionally for BMI when BMI is not an outcome. The analysis was performed on log-transformed variables.

Abbreviations: SNP, Single nucleotide polymorphism; GRS, Genetic risk score; BMI, Body mass index; WC, Waist circumference; WHR, Waist hip ratio.

**Table S5.** Interactions between the 12-SNP GRS and lifestyle factors on obesity-related traits.

|                          | <b>Protein<br/>(g/day)</b> | <b>Fat<br/>(g/day)</b> | <b>Carbohydrate<br/>(g/day)</b> | <b>Fibre<br/>(g/day)</b> | <b>Physical<br/>activity</b> |
|--------------------------|----------------------------|------------------------|---------------------------------|--------------------------|------------------------------|
| BMI (kg/m <sup>2</sup> ) | 0.91                       | 0.46                   | 0.47                            | 0.25                     | 0.87                         |
| WC (cm)                  | 0.13                       | 0.98                   | 0.14                            | 0.06                     | 0.43                         |
| WHR                      | 0.99                       | 0.77                   | 0.74                            | 0.49                     | 0.02                         |
| Visceral fat (%)         | 0.96                       | 0.62                   | 0.66                            | 0.75                     | 0.54                         |
| Body fat (%)             | 0.22                       | 0.89                   | 0.09                            | 0.11                     | 0.50                         |

Data are P values obtained from linear regression analysis adjusted for age, sex, total energy intake and additionally for BMI when BMI is not an outcome. The analysis was performed on log-transformed variables.

Abbreviations: SNP, Single nucleotide polymorphism; GRS, Genetic risk score; BMI, Body mass index; WC, Waist circumference; WHR, Waist hip ratio.

**Table S6.** Interactions between the 8-SNP GRS and lifestyle factors on obesity-related traits.

|                          | <b>Protein</b> | <b>Fat</b>     | <b>Carbohydrate</b> | <b>Fibre</b>   | <b>Physical</b> |
|--------------------------|----------------|----------------|---------------------|----------------|-----------------|
|                          | <b>(g/day)</b> | <b>(g/day)</b> | <b>(g/day)</b>      | <b>(g/day)</b> | <b>Activity</b> |
| BMI (kg/m <sup>2</sup> ) | 0.93           | 0.47           | 0.56                | 0.25           | 0.48            |
| WC (cm)                  | 0.07           | 0.82           | 0.07                | 0.02           | 0.83            |
| WHR                      | 0.95           | 0.76           | 0.76                | 0.50           | 0.04            |
| Visceral fat (%)         | 0.91           | 0.64           | 0.09                | 0.71           | 0.46            |
| Body fat (%)             | 0.14           | 0.92           | 0.62                | 0.11           | 0.47            |

Data are P values obtained from linear regression analysis adjusted for age, sex, total energy intake and additionally for BMI when BMI is not an outcome. The analysis was performed on log-transformed variables.

Abbreviations: SNP, Single nucleotide polymorphism; GRS, Genetic risk score; BMI, Body mass index; WC, Waist circumference; WHR, Waist hip ratio.

**Table S7.** Interactions between the 4-SNP GRS and sex on obesity-related traits.

| Interaction                                   | P value* |
|-----------------------------------------------|----------|
| 4-SNP GRS*Sex interaction on BMI              | 0.13     |
| 4-SNP GRS*Sex interaction on WC               | 0.29     |
| 4-SNP GRS*Sex interaction on WHR              | 0.25     |
| 4-SNP GRS*Sex interaction on Visceral fat (%) | 0.42     |
| 4-SNP GRS*Sex interaction on Body fat (%)     | 0.14     |

\*P values obtained from linear regression analysis adjusted for age, sex and additionally for BMI when BMI is not an outcome. The analysis was performed on log-transformed variables.

Abbreviations: SNP, Single nucleotide polymorphism; GRS, Genetic risk score; BMI, Body mass index; WC, Waist circumference; WHR, Waist hip ratio.
